# Supplementary material for: Calcitonin gene‐related peptide induces the histone H3 lysine 9 acetylation in astrocytes associated with neuroinflammation in rats with neuropathic pain
Source: PubMed Central journal article supplement (PMC8504526; doi:10.1111/cns.13720), 2021-08-16

Full unedited blots for Figure 1C

CGRP

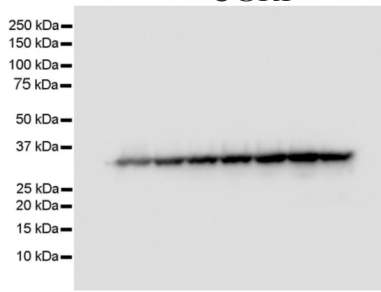

GFAP

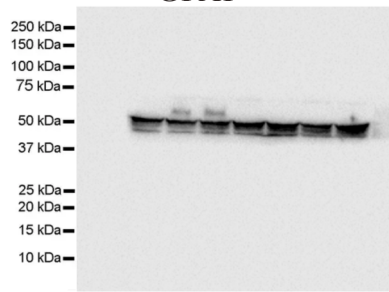

GAPDH

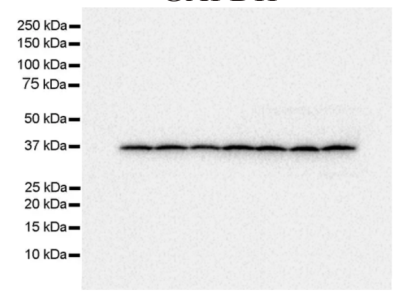

Full unedited blots for Figure 2C

H3K9ac

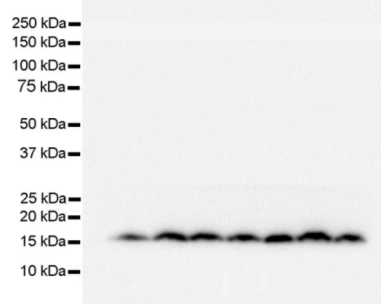

GAPDH

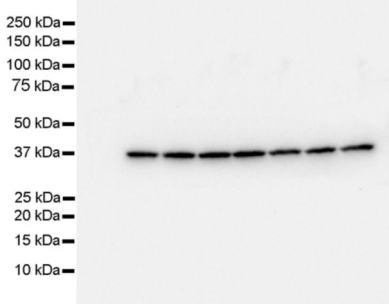

Full unedited blots for Figure 3B

H3K9ac

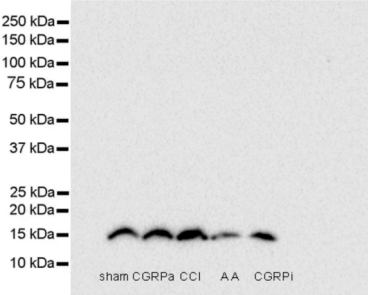

C

H3K9ac

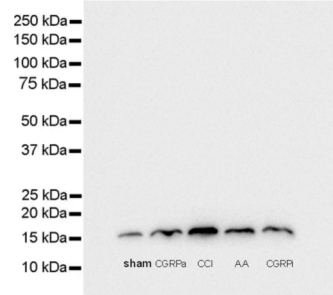

D

H3K9ac

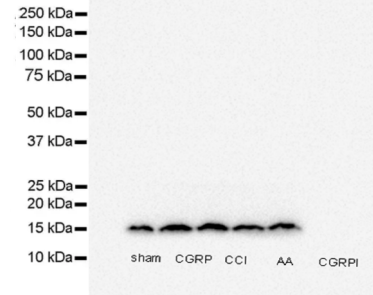

E

H3K9ac

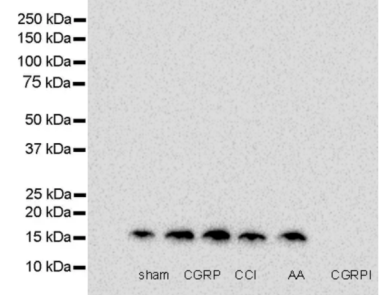

GAPDH

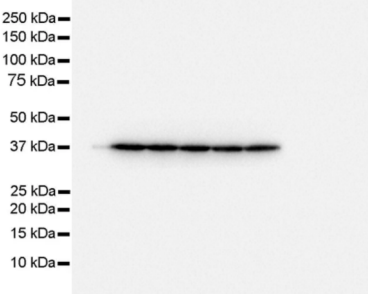

GAPDH

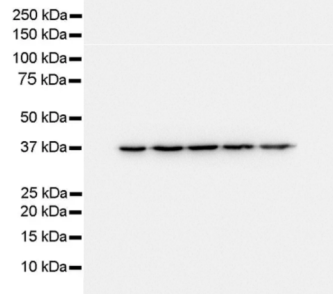

GAPDH

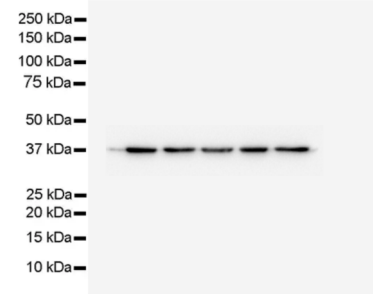

GAPDH

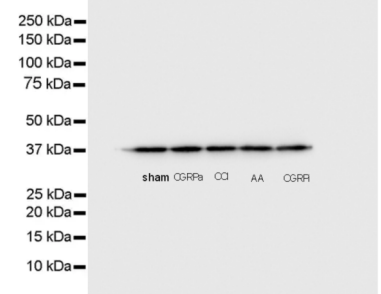

Full unedited blots for Figure 4B

H3K9ac

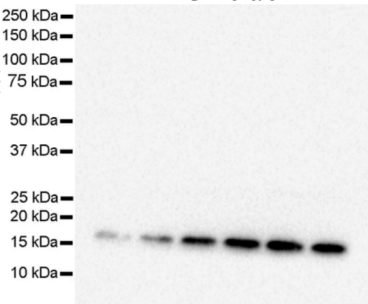

C

H3K9ac

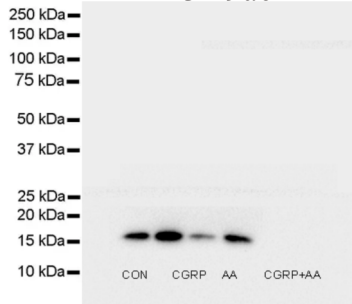

D

GFAP

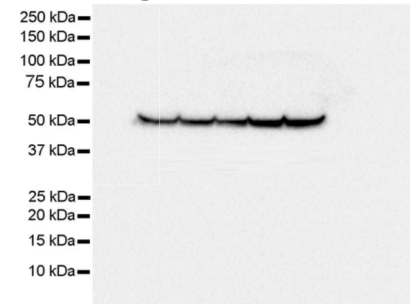

GAPDH

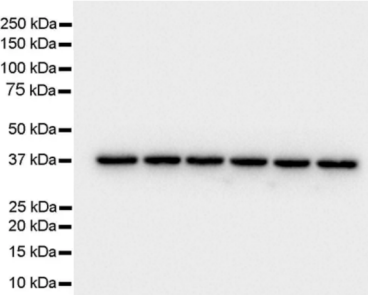

GAPDH

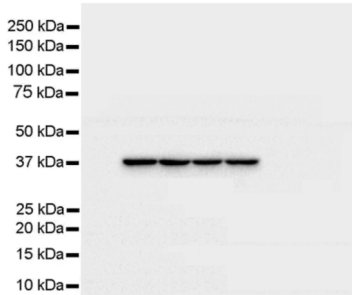

GAPDH

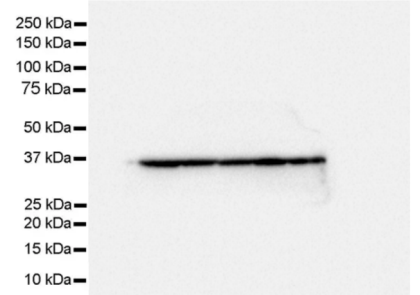

Full unedited blots for Figure 6B

LC3B

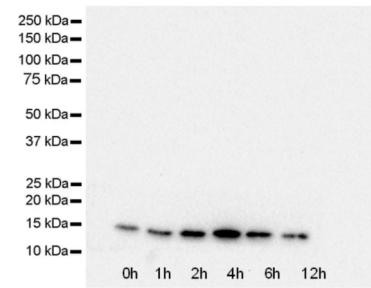

CX3CR1

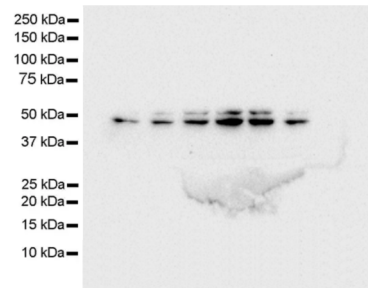

GAPDH

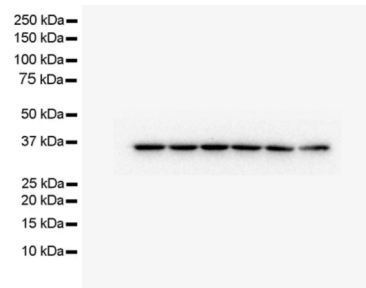

Full unedited blots for Figure 6C

IL-1 $\beta$

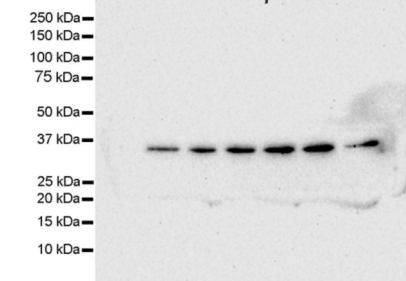

GAPDH

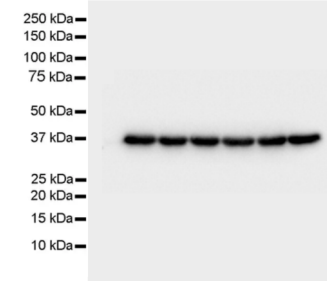

Full unedited blots for Figure 6D

LC3B

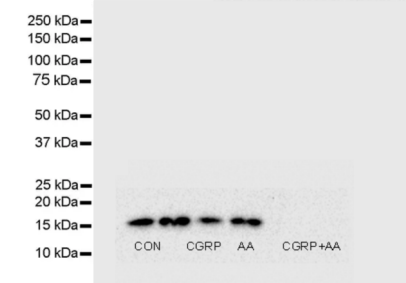

CX3CR1

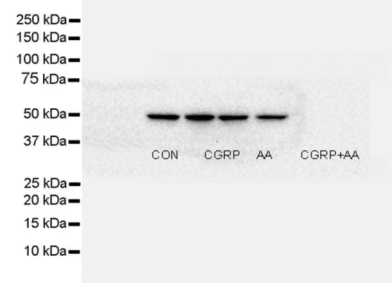

GAPDH

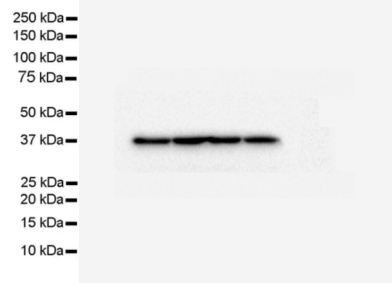

Full unedited blots for Figure 6E

IL-1 $\beta$

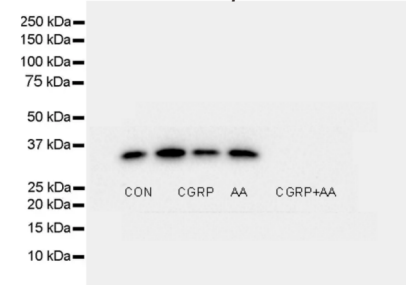

GAPDH

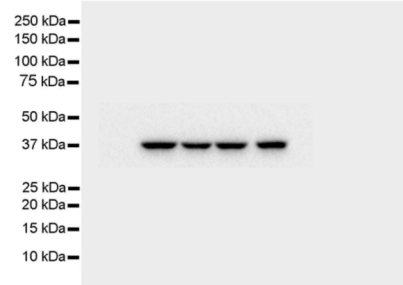

Full unedited blots for Figure 6F

LC3B

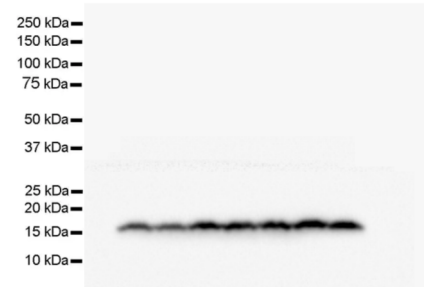

CX3CR1

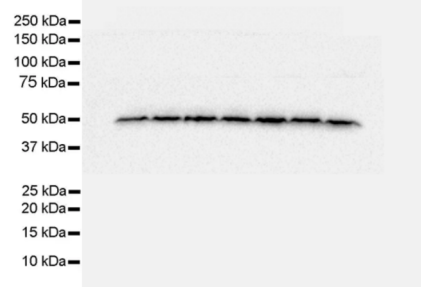

GAPDH

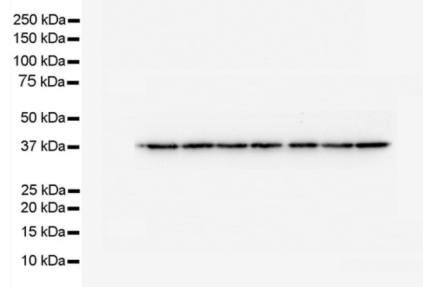

Full unedited blots for Figure 6G

IL-1 $\beta$

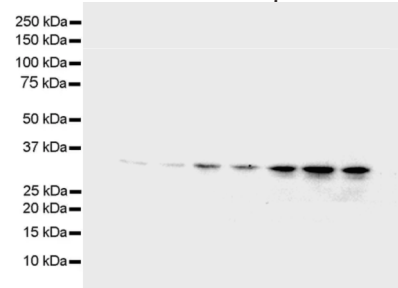

GAPDH

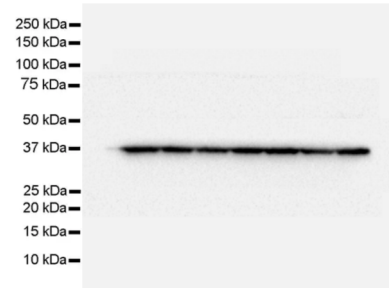

CX3CR1

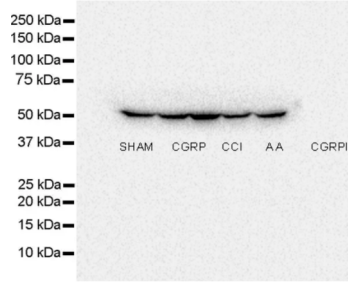

I  
IL-1B

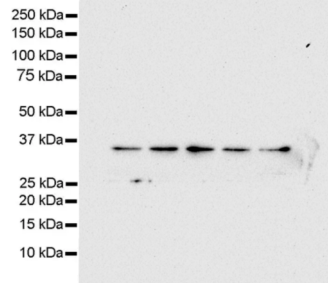

J  
CX3CR1

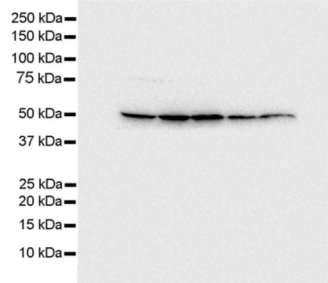

K  
IL-1B

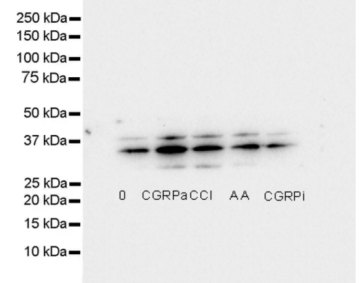

GAPDH

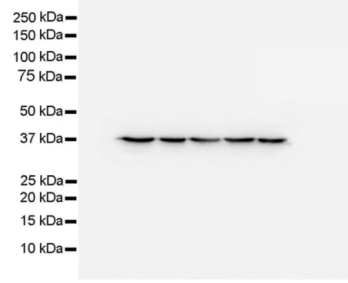

GAPDH

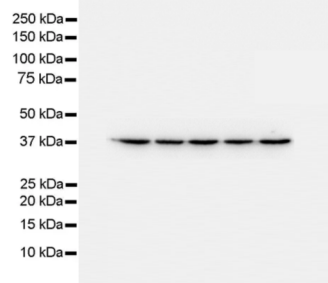

GAPDH

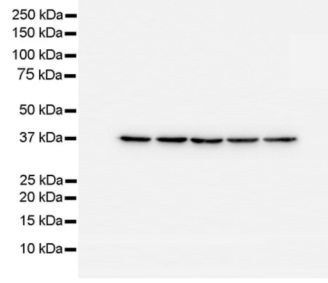

GAPDH

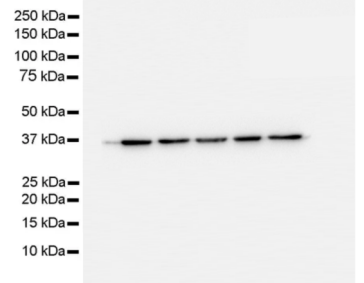

Supplement: CNS-27-1409-s001.pdf [file CNS-27-1409-s001.pdf]
