# Supplementary material for: Calcitonin gene‐related peptide induces the histone H3 lysine 9 acetylation in astrocytes associated with neuroinflammation in rats with neuropathic pain
Source: PubMed Central journal article supplement (PMC8504526; doi:10.1111/cns.13720), 2021-08-16

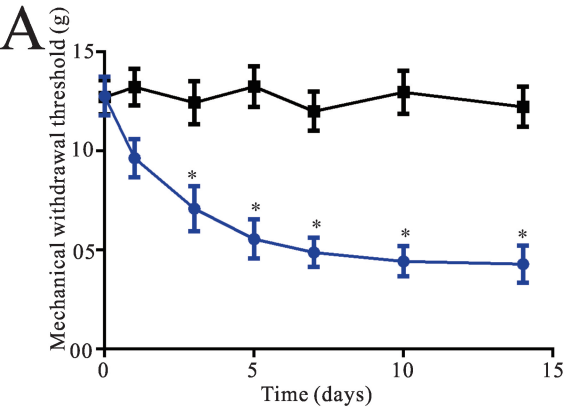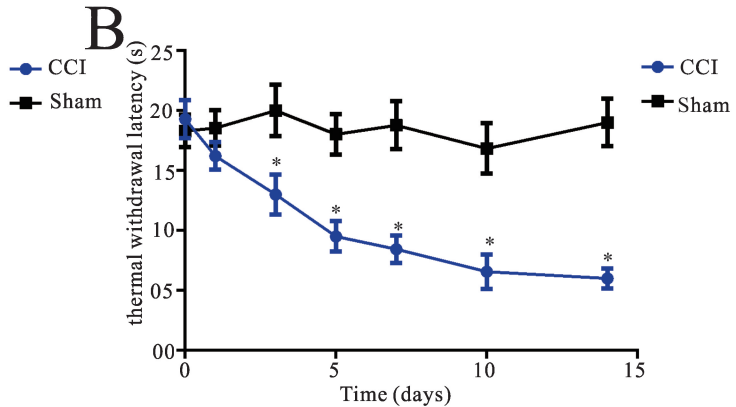

Supplement: CNS-27-1409-s005.pdf [file CNS-27-1409-s005.pdf]
